# Supplementary material for: Susceptibility of enveloped and non-enveloped viruses to ultraviolet light-emitting diode (UV-LED) irradiation and implications for virus inactivation mechanisms
Source: Royal Society of Chemistry journal article supplement (doi:10.1039/d3ew00277b), 2023-01-01
Supplement: d3ew00277b1.pdf [file d3ew00277b1.pdf]

## Susceptibility of enveloped and non-enveloped viruses to ultraviolet light-emitting diodes (UV-LEDs) irradiation and implications for virus inactivation mechanisms

Vu Duc Canh<sup>a,\*</sup>, Midori Yasui<sup>a</sup>, Shotaro Tori<sup>b</sup>, Kumiko Oguma<sup>a</sup>, Hiroyuki Katayama<sup>a,\*</sup>

<sup>a</sup> Department of Urban Engineering, The University of Tokyo, 7-3-1 Hongo, Bunkyo-ku, Tokyo 113-8656, Japan

<sup>b</sup> Laboratory of Environmental Chemistry, School of Architecture, Civil and Environmental Engineering (ENAC), École Polytechnique Fédérale de Lausanne (EPFL), Lausanne, Switzerland

Corresponding author: Department of Urban Engineering, The University of Tokyo, 7-3-1 Hongo, Bunkyo-ku, Tokyo 113-8656, Japan

E-mail: canh@env.t.u-tokyo.ac.jp (V.D Canh); katayama@env.t.u-tokyo.ac.jp (H. Katayama)

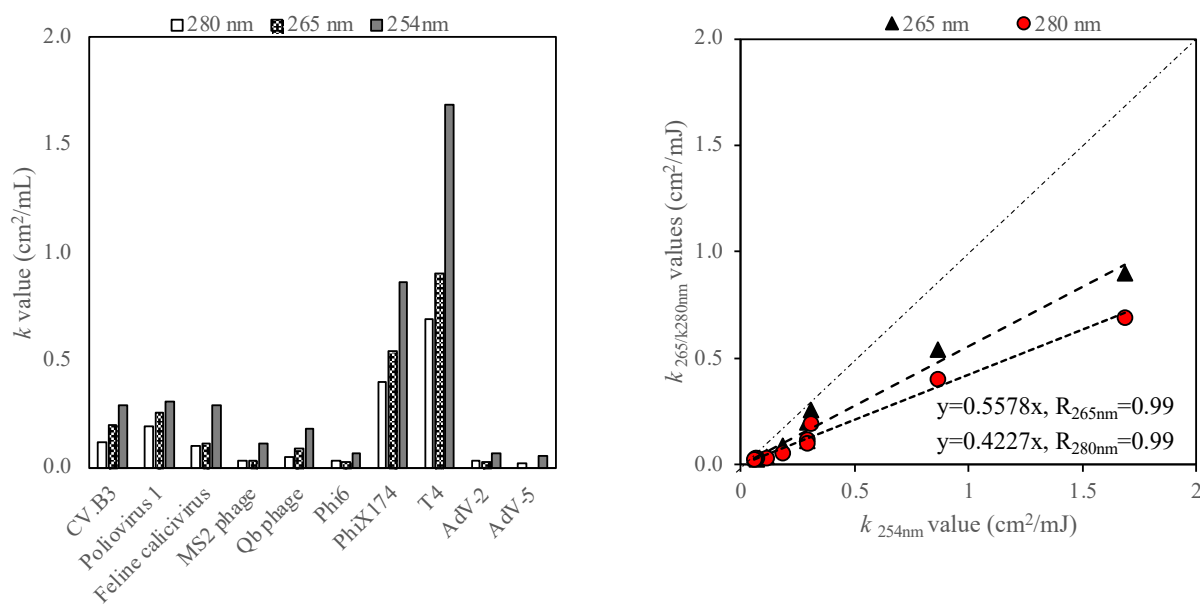

**Fig. S1** The inactivation rate constants of LP-UV at 254nm and UV-LED at 280 and 265nm (A). The correlation between the inactivation rate constants of LP-UV at 254 nm and UV-LED at 280 and 265nm (B). The inactivation rate constants of LP-UV at 254 nm were used from a previous review work (Rockey *et al.*, 2021), while the data of UV-LED at 280 and 265 nm were used from Table 1 in this study. Only viruses with inactivation rate constants available for both 254 nm, 265nm, and 280nm were used for the analysis.
